# Supplementary material for: Adaptation of Microbial Communities to Environmental Arsenic and Selection of Arsenite-Oxidizing Bacteria From Contaminated Groundwaters
Source: Front Microbiol. 2021 Mar 19;12:634025. doi: 10.3389/fmicb.2021.634025 (PMC8017173; doi:10.3389/fmicb.2021.634025)
Supplement: Supplementary file 1 [file Data_Sheet_1.xlsx]

## Sheet: Data_Sheet_1
Phylum	Class	Order	Family	Genus	DSRB	SOB	FeRB	FeOB	MnRB	MnOB	DAsRB	AsRB	AsOB	AsMB
Actinobacteria	Actinobacteria	Corynebacteriales	Corynebacteriaceae	Corynebacterium	-	-	-	-	Di-Ruggiero and Gounot, 1990	-	-	Achour et al., 2007; ArsC in NCBI	AioA in NCBI	Drewniak and Sklodowska, 2012; ArsM in NCBI
Actinobacteria	Actinobacteria	Corynebacteriales	Mycobacteriaceae	Mycobacterium	-	-	-	-	-	Marcus et al., 2017	-	Achour et al., 2007; ArsC in NCBI	AioA in NCBI	ArsM in NCBI
Actinobacteria	Actinobacteria	Micrococcales	Microbacteriaceae	Microbacterium	-	-	-	-	-	Marcus et al., 2017	-	ArsBC in NCBI	AioA in NCBI	ArsM in NCBI
Actinobacteria	Actinobacteria	Micrococcales	Micrococcaceae	Arthrobacter	-	-	-	-	-	Tebo et al., 2005	-	ArsBC in NCBI	-	ArsM in NCBI
Actinobacteria	Actinobacteria	Pseudonocardiales	Pseudonocardiaceae	Pseudonocardia	-	-	-	-	-	Cahyani et al., 2009	-	ArsBC in NCBI	-	ArsM in NCBI
Bacteroidota	Bacteroidia	Flavobacteriales	Flavobacteriaceae	Flavobacterium	-	-	-	-	-	-	-	ArsBC in NCBI	AioA in NCBI	Drewniak and Sklodowska, 2012
Bacteroidota	Bacteroidia	Flavobacteriales	Weeksellaceae	Chryseobacterium	-	-	-	-	-	-	-	ArsBC in NCBI	-	-
Firmicutes	Bacilli	Bacillales	Bacillaceae	Bacillus pumilus	-	-	Lovley, 2006	-	Nealson et al., 1991	Tebo et al., 2005	Cavalca et al., 2013; Giloteaux et al., 2013	Achour et al., 2007; ArsC in NCBI	Heinrich-Salmeron et al., 2011	ArsM in NCBI
Firmicutes	Bacilli	Bacillales	Planococcaceae	Lysinibacillus	-	-	-	-	-	Marcus et al., 2017	-	ArsC in NCBI	-	ArsM in NCBI
Firmicutes	Bacilli	Lactobacillales	Lactobacillaceae	Lactobacillus	-	-	-	-	-	Archibald and Fridovic, 1981	-	ArsC in NCBI	-	-
Firmicutes	Clostridia	Clostridiales	Clostridiaceae 1	Clostridium sensu stricto 1	-	-	-	-	-	-	-	ArsC in NCBI	AioA in NCBI	Bentley and Chasteen, 2002
Gemmatimonadetes	Gemmatimonadetes	Gemmatimonadales	Gemmatimonadaceae	Gemmatimonas	-	-	-	-	-	-	-	ArsC in NCBI	-	Jia et al., 2012
Nitrospirae	Nitrospira	Nitrospirales	Nitrospiraceae	Leptospirillum	-	-	-	Emerson, 2010; Drewniak and Sklodowska, 2013	-	-	-	ArsC in NCBI	-	ArsM in NCBI
Nitrospirae	Nitrospira	Nitrospirales	Nitrospiraceae	Nitrospira	-	-	-	-	-	-	-	ArsC in NCBI	AioA in NCBI	Jia et al., 2012
Proteobacteria	Alphaproteobacteria	Caulobacterales	Caulobacteraceae	Brevundimonas	-	-	-	-	-	-	-	ArsC in NCBI	-	-
Proteobacteria	Alphaproteobacteria	Rhizobiales	Bradyrhizobiaceae	Bosea	-	Walczak et al., 2018	-	-	-	Marcus et al., 2017	-	ArsC in NCBI	Rhine et al., 2008; Walczak et al., 2018; AioA in NCBI	ArsM in NCBI
Proteobacteria	Alphaproteobacteria	Rhizobiales	Bradyrhizobiaceae	Bradyrhizobium	-	Meyer et al., 2007	-	-	-	-	-	ArsC and ACR3 in NCBI	AioA in NCBI	ArsM in NCBI
Proteobacteria	Alphaproteobacteria	Rhizobiales	Hyphomicrobiaceae	Hyphomicrobium	-	-	-	-	-	Tebo et al., 2005	-	ArsC in NCBI	AioA in NCBI	ArsM in NCBI
Proteobacteria	Alphaproteobacteria	Rhizobiales	Hyphomicrobiaceae	Pedomicrobium	-	-	-	-	-	Tebo et al., 2005	-	-	-	-
Proteobacteria	Alphaproteobacteria	Rhizobiales	Hyphomicrobiaceae	Devosia	-	-	-	-	-	-	-	ArsC in NCBI	AioA in NCBI	-
Proteobacteria	Alphaproteobacteria	Rhizobiales	Methylobacteriaceae	Methylobacterium	-	Friedrich et al., 2005	-	-	-	Cahyani et al., 2009	-	ArsC in NCBI	AioA in NCBI	-
Proteobacteria	Alphaproteobacteria	Rhizobiales	Rhizobiaceae	Rhizobium etli	-	-	-	-	-	-	-	ArsC in NCBI	Hamamura et al., 2008	-
Proteobacteria	Alphaproteobacteria	Rhodobacterales	Rhodobacteraceae	Paracoccus	-	Friedrich et al., 2005; Meyer et al., 2007	-	Hedrich et al., 2011; Dubinina and Sorokina, 2014	-	-	-	Achour et al., 2007; ArsC in NCBI	AioA in NCBI	-
Proteobacteria	Alphaproteobacteria	Rhodospirillales	Acetobacteraceae	Acidiphilium	-	Meyer et al., 2007	-	-	-	-	-	ArsC in NCBI	AioA in NCBI	-
Proteobacteria	Alphaproteobacteria	Rhodospirillales	Rhodospirillaceae	Magnetospirillum	-	Geelhoed et al., 2010	-	-	-	-	-	Giloteaux et al., 2013	-	ArsM in NCBI
Proteobacteria	Alphaproteobacteria	Rhodospirillales	Rhodospirillales Incertae Sedis	Reyranella	-	-	-	-	-	Marcus et al., 2017	-	ArsC in NCBI	AioA in NCBI	-
Proteobacteria	Alphaproteobacteria	Sphingomonadales	Sphingomonadaceae	Sphingomonas	-	-	-	-	-	-	-	ArsC and ACR3 in NCBI	-	-
Proteobacteria	Alphaproteobacteria	Sphingomonadales	Sphingomonadaceae	Sphingopyxis	-	-	-	-	-	-	-	Achour et al., 2007	AioA in NCBI	-
Proteobacteria	Betaproteobacteria	Burkholderiales	Alcaligenaceae	Achromobacter	-	-	-	-	-	-	-	Giloteaux et al., 2013	Hamamura et al., 2008; Cavalca et al., 2013	Drewniak and Sklodowska, 2012
Proteobacteria	Betaproteobacteria	Burkholderiales	Burkholderiaceae	Burkholderia	-	-	-	-	-	Marcus et al., 2017	-	Giloteaux et al., 2013	Cavalca et al., 2013	Drewniak and Sklodowska, 2012
Proteobacteria	Betaproteobacteria	Burkholderiales	Burkholderiaceae	Ralstonia	-	Meyer et al., 2007	-	-	-	-	-	ArsC in NCBI	Cavalca et al., 2013	-
Proteobacteria	Betaproteobacteria	Burkholderiales	Comamonadaceae	Acidovorax	-	-	-	Hedrich et al., 2011; Dubinina and Sorokina, 2014; Melton et al. 2014	-	-	-	ArsC in NCBI	Cavalca et al., 2013	-
Proteobacteria	Betaproteobacteria	Burkholderiales	Comamonadaceae	Aquabacterium	-	-	-	Hedrich et al., 2011; Dubinina and Sorokina, 2014	-	-	-	ArsC in NCBI	AioA in NCBI	-
Proteobacteria	Betaproteobacteria	Burkholderiales	Comamonadaceae	Variovorax	-	-	-	-	-	Tebo et al., 2005	-	ArsC in NCBI	Hamamura et al., 2008	-
Proteobacteria	Betaproteobacteria	Burkholderiales	Oxalobacteraceae	Massilia	-	-	-	-	-	-	-	ArsC in NCBI	-	-
Proteobacteria	Betaproteobacteria	Hydrogenophilales	Hydrogenophilaceae	Ferritrophicum	-	-	-	Emerson, 2010; Hedrich et al., 2011; Dubinina and Sorokina, 2014	-	-	-	-	-	-
Proteobacteria	Betaproteobacteria	Hydrogenophilales	Hydrogenophilaceae	Sulfuricella	-	Kojima and Fukui, 2010	-	-	-	-	-	ArsC in NCBI	-	ArsM in NCBI
Proteobacteria	Betaproteobacteria	Hydrogenophilales	Hydrogenophilaceae	Thiobacillus	-	Meyer et al., 2007	Lovley, 2006	Emerson, 2010; Hedrich et al., 2011; Dubinina and Sorokina, 2014; Melton et al., 2014	-	-	-	ArsC in NCBI	-	Jia et al., 2012
Proteobacteria	Betaproteobacteria	Nitrosomonadales	Gallionellaceae	Gallionella	-	-	-	Emerson, 2010; Hedrich et al., 2011; Dubinina and Sorokina, 2014; Melton et al., 2014	-	-	-	ArsC in NCBI	-	-
Proteobacteria	Betaproteobacteria	Nitrosomonadales	Gallionellaceae	Sideroxydans	-	-	-	Emerson, 2010; Hedrich et al., 2011; Dubinina and Sorokina, 2014; Melton et al., 2014	-	-	-	Giloteaux et al., 2013; ArsC in NCBI	-	-
Proteobacteria	Betaproteobacteria	Rhodocyclales	Rhodocyclaceae	Sulfuritalea	-	Kojima and Fukui, 2011	-	-	-	-	-	ArsC in NCBI	-	-
Proteobacteria	Gammaproteobacteria	Chromatiales	Ectothiorhodospiraceae	Acidiferrobacter	-	-	-	Hedrich et al., 2011	-	-	-	-	-	ArsM in NCBI
Proteobacteria	Gammaproteobacteria	Pseudomonadales	Moraxellaceae	Acinetobacter	-	-	-	-	Di-Ruggiero and Gounot, 1991		-	-	Cavalca et al., 2013	-
Proteobacteria	Gammaproteobacteria	Pseudomonadales	Pseudomonadaceae	Pseudomonas	-	-	-	Dubinina and Sorokina, 2014	Nealson et al., 1991	Tebo et al., 2005	-	Achour et al., 2007	Cavalca et al., 2013	ArsM in NCBI
Proteobacteria	Gammaproteobacteria	Xanthomonadales	Xanthomonadaceae	Luteimonas	-	-	-	-	-	-	-	ArsC in NCBI	AioA in NCBI	-
Proteobacteria	Gammaproteobacteria	Xanthomonadales	Xanthomonadaceae	Lysobacter	-	-	-	-	-	-	-	ArsC in NCBI	AioA in NCBI	-
Proteobacteria	Gammaproteobacteria	Xanthomonadales	Xanthomonadaceae	Stenotrophomonas	-	-	-	-	-	-	-	ArsC in NCBI	Cavalca et al., 2013	-
Proteobacteria	Gammaproteobacteria	Thiotrichales	Thiotrichaceae	Thiothrix	-	Meyer et al., 2007	-	-	-	-	-	ArsC in NCBI	-	-
Proteobacteria	Deltaproteobacteria	Desulfarculales	Desulfarculaceae	Desulfarculaceae	Kuever, 2014	-	-	-	-	-	-	-	-	-
Proteobacteria	Deltaproteobacteria	Desulfobacterales	Desulfobacteraceae	Desulfobacula	Muyzer and Stams, 2008	-	-	-	-	-	-	ArsC, ArsB and ACR3 in NCBI	-	-
Proteobacteria	Deltaproteobacteria	Desulfobacterales	Desulfobacteraceae	Desulfobacteraceae	Muyzer and Stams, 2008	-	-	-	-	-	-	-	-	-
Proteobacteria	Deltaproteobacteria	Desulfobacterales	Desulfobulbaceae	Desulfobulbus	Muyzer and Stams, 2008	-	-	-	-	-	-	Giloteaux et al., 2013	-	Jia et al., 2012
Proteobacteria	Deltaproteobacteria	Desulfobacterales	Desulfobulbaceae	Desulfurivibrio	Muyzer and Stams, 2008	-	-	-	-	-	-	ArsC in NCBI	-	-
Proteobacteria	Deltaproteobacteria	Desulfobacterales	Desulfobulbaceae	-	Muyzer and Stams, 2008	-	-	-	-	-	-	-	-	-
Proteobacteria	Deltaproteobacteria	Desulfovibrionales	Desulfovibrionaceae	Desulfovibrio	Muyzer and Stams, 2008	-	-	-	-	-	-	Giloteaux et al., 2013; ArsC in NCBI	-	Michalke et al., 2000; Bentley and Chasteen, 2002; Jia et al., 2012; ArsM in NCBI
Proteobacteria	Deltaproteobacteria	Syntrophobacterales	Syntrophaceae	Desulfomonile	Muyzer and Stams, 2008	-	-	-	-	-	-	ArsC in NCBI	-	ArsM in NCBI
Proteobacteria	Deltaproteobacteria	Syntrophobacterales	Syntrophaceae	Syntrophus	-	-	-	-	-	-	-	Giloteaux et al., 2013	-	-
Proteobacteria	Epsilonproteobacteria	Campylobacterales	Campylobacteraceae	Arcobacter	-	Sievert et al., 2007	-	-	Vandieken et al., 2012	-	-	ArsC in NCBI	-	ArsM in NCBI
Proteobacteria	Epsilonproteobacteria	Campylobacterales	Helicobacteraceae	Sulfuricurvum	-	Kodama et al., 2004	-	-	-	-	-	ArsC in NCBI	-	-
Proteobacteria	Epsilonproteobacteria	Campylobacterales	Helicobacteraceae	Sulfurimonas	-	Meyer et al., 2007	-	-	-	-	-	ArsC in NCBI	-	-
Verrucomicrobia	Opitutae	Opitutales	Opitutaceae	Opitutus	-	-	-	-	-	-	-	Giloteaux et al., 2013	-	Jia et al., 2012
References
Achour, A.R., Bauda, P., and Billard, P. (2007). Diversity of arsenite transporter genes from arsenic-resistant soil bacteria. Res. Microbiol. 158, 128-137. https://doi.org/10.1016/j.resmic.2006.11.006.
Archibald, F.S., and Fridovich, I. (1981). Manganese and defenses against oxygen-toxicity in Lactobacillus plantarum. J. Bacteriol. 145, 442–451.
Bentley, R., and Chasteen, T.G. (2002). Microbial methylation of metalloids: arsenic, antimony, and bismuth. Microbiol. Mol. Biol. Rev. 66(2), 250-271. https://10.1128/MMBR.66.2.250-271.2002.
Cahyani, V. R., Murase, J., Ishibashi, E., Asakawa, S., and Kimura, M. (2009). Phylogenetic positions of Mn 2+-oxidizing bacteria and fungi isolated from Mn nodules in rice field subsoils. Biol. Fertil. Soils 45(4), 337-346. https://doi.org/10.1007/s00374-008-0337-8.
Cavalca, L., Corsini, A., Zaccheo, P., Andreoni, V., and Muyzer, G. (2013). Microbial transformations of arsenic: perspectives for biological removal of arsenic from water. Future Microbiol 86: 753-768. https://doi.org/10.2217/fmb.13.38.
Di-Ruggiero, J., and Gounot, A.M. (1990). Microbial manganese reduction mediated by bacterial strains isolated from aquifer sediments. Microb. Ecol. 20(1), 53-63.
Drewniak, L., and Sklodowska, A. (2013). Arsenic-transforming microbes and their role in biomining processes. Environ. Sci. Pollut. Res. 20, 7728-7739. https://doi.org/10.1007/s11356-012-1449-0.
Dubinina, G.A., and Sorokina, A.Y. (2014). Neutrophilic lithotrophic iron-oxidizing prokaryotes and their role in the biogeochemical processes of the iron cycle. Microbiology 83, 1-14. https://doi.org/10.1134/S0026261714020052.
Emerson, D., Fleming, E.J., and McBeth, J.M. (2010). Iron-oxidizing bacteria: an environmental and genomic perspective. Ann. Rev. Microbiol. 64, 561-83. https://doi.org/10.1146/annurev.micro.112408.134208.
Friedrich, C.G., Bardischewsky, F., Rother, D., Quentmeier, A., and Fischer, J. (2005). Prokaryotic sulfur oxidation. Curr. Opin. Microbiol. 8: 253-259. https://doi.org/10.1016/j.mib.2005.04.005.
Geelhoed, J.S., Kleerebezem, R., Sorokin, D.Y., Stams, A.J., and Van Loosdrecht, M.C. (2010). Reduced inorganic sulfur oxidation supports autotrophic and mixotrophic growth of Magnetospirillum strain J10 and Magnetospirillum gryphiswaldense. Environ. Microbiol. 12(4), 1031-1040. https://doi.org/10.1111/j.1462-2920.2009.02148.x.
Giloteaux, L., Duran, R., Casiot, C., Bruneel, O., Elbaz-Poulichet, F., and Goñi-Urriza, M. (2013). Three-year survey of sulfate-reducing bacteria community structure in Carnoulès acid mine drainage (France), highly contaminated by arsenic. FEMS Microbiol. Ecol. 83: 724-737. https://doi.org/10.1111/1574-6941.12028.
Hamamura, N., Macur, R.E., Korf, S., Ackerman, G., Taylor, W.P., Kozubal, M., et al. (2009). Linking microbial oxidation of arsenic with detection and phylogenetic analysis of arsenite oxidase genes in diverse geothermal environments. Environ. Microbiol. 11(2), 421-431. https://doi.org/10.1111/j.1462-2920.2008.01781.x.
Hedrich, S., Schlömann, M., and Johnson, D.B. (2011). The iron-oxidizing Proteobacteria. Microbiology 157: 1551-1564. https://doi.org/10.1099/mic.0.045344-0.
Heinrich-Salmeron, A., Cordi, A., Brochier-Armanet, C., Halter, D., Pagnout, C., Abbaszadeh-Fard, E., et al. (2011). Unsuspected diversity of arsenite-oxidizing bacteria as revealed by widespread distribution of the aoxB gene in prokaryotes. Appl. Environ. Microbiol. 77(13), 4685-4692. https://doi.org/10.1128/AEM.02884-10
Jia, Y., Huang, H., Sun, G.X., Zhao, F.J., and Zhu, Y.G. (2012). Pathways and relative contributions to arsenic volatilization from rice plants and paddy soil. Environ. Sci. Technol. 46, 8090-8096. https://doi.org/10.1021/es300499a.
Kodama, Y., and Watanabe, K. (2004). Sulfuricurvum kujiense gen. nov., sp. nov., a facultatively anaerobic, chemolithoautotrophic, sulfur-oxidizing bacterium isolated from an underground crude-oil storage cavity. Int. J. Sys. Evol. Microbiol. 54(6), 2297-2300. https://doi.org/10.1099/ijs.0.63243-0.
Kojima, H., and Fukui, M. (2010). Sulfuricella denitrificans gen. nov., sp. nov., a sulfur-oxidizing autotroph isolated from a freshwater lake. Int. J. Syst. Evol. Microbiol. 60(12), 2862-2866. https://doi.org/10.1099/ijs.0.016980-0.
Kojima, H., and Fukui, M. (2011). Sulfuritalea hydrogenivorans gen. nov., sp. nov., a facultative autotroph isolated from a freshwater lake. Int. J. Sys. Evol. Microbiol. 61(7), 1651-1655. https://doi.org/10.1099/ijs.0.024968-0.
Kuever J. (2014) The Family Desulfarculaceae. In: Rosenberg E., DeLong E.F., Lory S., Stackebrandt E., Thompson F. (eds) The Prokaryotes. Springer, Berlin, Heidelberg
Lovley, D., 2006. Dissimilatory Fe(III)- and Mn(IV)-reducing prokaryotes. Prokaryotes 2, 635-658. https://doi.org/10.1007/0-387-30742-7_21.
Marcus, D.N., Pinto, A., Anantharaman, K., Ruberg, S.A., Kramer, E.L., Raskin, L., et al. (2017). Diverse manganese (II)‐oxidizing bacteria are prevalent in drinking water systems. Environ. Microbiol. Rep. 9(2), 120-128. https://doi.org/10.1111/1758-2229.12508.
Melton, E.D., Swanner, E.D., Behrens, S., Schmidt, C., and Kappler, A. (2014). The interplay of microbially mediated and abiotic reactions in the biogeochemical Fe cycle. Nat. Rev. Microbiol. 12, 797-808. https://doi.org/10.1038/nrmicro3347.
Meyer, B., Imhoff, J.F., and Kuever, J. (2007). Molecular analysis of the distribution and phylogeny of the soxB gene among sulfur-oxidizing bacteria – evolution of the Sox sulfur oxidation enzyme system. Environ. Microbiol. 9(12), 2957-2977. https://doi.org/10.1111/j.1462-2920.2007.01407.x.
Michalke, K., Wickenheiser, E.B., Mehring, M., Hirner, A.V., and Hensel, R. (2000). Production of volatile derivates of metal(loid)s by microflora involved in anaerobic digestion of sewage sludge. Appl. Environ. Microbiol. 66(7), 2791–2796. https://doi.org/10.1128/AEM.66.7.2791-2796.2000.
Muyzer, G., and Stams, A.J. (2008). The ecology and biotechnology of sulphate-reducing bacteria. Nat. Rev. Microbiol. 6(6), 441-454. https://doi.org/10.1038/nrmicro1892.
Nealson, K.H., Myers, C.R., and Wimpee, B.B. (1991). Isolation and identification of manganese-reducing bacteria and estimates of microbial Mn(IV)-reducing potential in the Black Sea. DEEP-SEA RES. PT. I 38, S907-S920. https://doi.org/10.1016/S0198-0149(10)80016-0.
Rhine, E.D., Onesios, K.M., Serfes, M.E., Reinfelder, J.R., and Young, L.Y. (2008). Arsenic transformation and mobilization from minerals by the arsenite oxidizing strain WAO. Environ. Sci. Technol. 42(5), 1423-1429. https://doi.org/10.1021/es071859k.
Sievert, S. M., Kiene, R. P., and Schulz-Vogt, H. N. (2007). The sulfur cycle. Oceanography, 20(2), 117-123.
Tebo, B.M., Johnson, H.A., McCarthy, J.K., and Templeton, A.S. (2005). Geomicrobiology of manganese (II) oxidation. Trends Microbiol. 13(9), 421-428. https://doi.org/10.1016/j.tim.2005.07.009.
Vandieken, V., Pester, M., Finke, N., Hyun, J. H., Friedrich, M. W., Loy, A., et al. (2012). Three manganese oxide-rich marine sediments harbor similar communities of acetate-oxidizing manganese-reducing bacteria. The ISME journal, 6(11), 2078.
Walczak, A.B., Yee, N., and Young, L.Y. (2018). Draft genome sequence of Bosea sp. WAO an arsenite and sulfide oxidizer isolated from a pyrite rock outcrop in New Jersey. Stand. Genomic Sci. 13(1), 6.https://doi.org/10.1186/s40793-018-0312.-4
															Calyptogena magnifica symbiont

## Sheet: Data_Sheet_2
Target	Primer	Sequence	Concentration (ng µL-1)	Annealing T (°C)	Length (bp)	Standard DNA	Reference
Total Bacteria	Eub338F	ACT CCT ACG GGA GGC AGC AG	0.3	53	200	Strain 7 AsIII Res (Ochrobactrum tritici)	Fierer et al., 2005
	Eub518R	ATT ACC GCG GCT GCT GG
Total Archaea	ARC787F	ATT AGA TAC CCS BGT AGT CC	0.3	60	272	Methanobacterium formicicum	Yu et al., 2005
	ARC1059R	GCC ATG CAC CWC CTC T
Geobacteraceae	Geo564F	AAG CGT TGT TCG GAW TTA T	0.3	60	276	Clone GEO6	Cummings et al., 2003
	Geo840R	GGC ACT GCA GGG TCA ATA
Gallionella-like	628F	GBM AGG CTA GAG TGT AGC	0.3	56	370	Clone GAL1	Wang et al., 2009
	998R	CTC TGG AAA CTT CCT GAC
Shewanellaceae	She120F	GCC TAG GGA TCT GCC CAG TCG	0.3	60	100	Clone SHEW1	Himmelheber, 2009
	She220R	CTA GGT TCA TCC AAT CGC G
dsr	Drs1+-F	ACS CAC TGG AAG CAC GGC GG	0.3	59	221	Desulfobacterium autotrophicum	Merlino et al., 2013
	Dsr-R	GTG GMR CCG TGC AKR TTG G
cbbl	cbbLR1F	AAG GAY GAC GAG AAC ATC	0.3	60	270	Clone RUBISCO1	Selesi et al., 2007
	cbbLR1intR	TGC AGS ATC ATG TCR TT
aioA	aoxBM1-2F	CCA CTT CTG CAT CGT GGG NTG YGG NTA	0.3	59	550	Strain 1L (Achromobacter sp.)	Quemeneur et al., 2008
	aoxBM2-1R	GGA GTT GTA GGC GGG CCK RTT RTG DAT					Quemeneur et al., 2010
arsC	ArsC52F	AGC CAA ATG GCA GAA GC	0.4	55	275	Clone ArsC14	Bachate et al., 2009
	ArsC323R	GCT GGR TCR TCA AAT CCC CA
	amlt-42-F	TCG CGT AAT ACG CTG GAG AT	0.25	60	400	Strain (Serratia sp.)	Sun et al., 2004
	amlt-376-R	ACT TTC TCG CCG TCT TCC TT
arrA	ArrAF2	CAT CGC TTC TCG CTG TG	0.3	55	201	Clone 64	Upadhyaya et al., 2012
	ArrAR2	GAG GTA GTT GCA GTT TCG
arsM	arsMF1	TCY CTC GGC TGC GGC AAY CCV AC	0.3	60	346	Clone ArsM6	Jia et al., 2013
	arsMR2	CGW CCG CCW GGC TTW AGY ACC CG
References
Bachate, S.P., Cavalca, L., and Andreoni, V. (2009). Arsenic-resistant bacteria isolated from agricultural soils of Bangladesh and characterization of arsenate-reducing strains. J. Appl. Microbiol. 107, 145–156. doi: 10.1111/j.1365-2672. 2009.04188.x
Cummings, D.E., Snoeyenbos-West, O.L., Newby, D.T., Niggemyer, A.M., Lovley, D.R., Achenbach, L.A., et al. (2003). Diversity of Geobacteraceae species inhabiting metal-polluted freshwater lake sediments ascertained by 16S rDNA analyses. Microb. Ecol. 46(2), 257-269. doi: 10.1007/s00248-002-0005-8
Fierer, N., Jackson, J.A., Vilgalys, R., and Jackson, R.B. (2005). Assessment of soil microbial community structure by use of taxon-specific quantitative PCR assays. Appl. Environ. Microbiol. 71(7), 4117-4120. doi: 10.1128/AEM.71.7.4117-4120.2005
Himmelheber, D.W., Thomas, S.H., Löffler, F.E., Taillefert, M., and Hughes, J.B. (2009). Microbial colonization of an in situ sediment cap and correlation to stratified redox zones. Environ. Sci. Technol. 43(1), 66-74. doi: 10.1021/es801834e
Jia, Y., Huang, H., Zhong, M., Wang, F.H., Zhang, L.M., and Zhu, Y.G. (2013). Microbial arsenic methylation in soil and rice rhizosphere. Environ. Sci. Technol. 47(7), 3141-3148. doi: 10.1021/es303649v
Merlino, G., Rizzi, A., Schievano, A., Tenca, A., Scaglia, B., Oberti, R., et al. (2013). Microbial community structure and dynamics in two-stage vs single-stage thermophilic anaerobic digestion of mixed swine slurry and market bio-waste. Water Res. 47(6), 1983-1995. doi: 10.1016/j.watres.2013.01.007
Quéméneur, M., Cébron, A., Billard, P., Battaglia-Brunet, F., Garrido, F., Leyval, C., et al. (2010). Population structure and abundance of arsenite-oxidizing bacteria along an arsenic pollution gradient in waters of the upper isle River Basin, France. Appl. Environ. Microbiol. 76(13). 4566-4570. doi: 10.1128/AEM.03104-09
Quéméneur, M., Heinrich-Salmeron, A., Muller, D., Lièvremont, D., Jauzein, M., Bertin, P.N., et al. (2008). Diversity surveys and evolutionary relationships of aoxB genes in aerobic arsenite-oxidizing bacteria. Appl. Environ. Microbiol. 74(14), 4567-4573. doi: 10.1128/AEM.02851-07
Selesi, D., Pattis, I., Schmid, M., Kandeler, E., and Hartmann, A. (2007). Quantification of bacterial RubisCO genes in soils by cbbL targeted real-time PCR. J. Microbiol. Meth. 69(3), 497-503. doi: 10.1016/j.mimet.2007.03.002
Sun, Y., Polishchuk, E. A., Radoja, U., and Cullen, W. R. (2004). Identification and quantification of arsC genes in environmental samples by using real-time PCR. J. Microbiol. Methods 58, 335–349. doi: 10.1016/j.mimet.2004.04.015
Upadhyaya, G., Clancy, T.M., Brown, J., Hayes, K.F., and Raskin, L. (2012). Optimization of arsenic removal water treatment system through characterization of terminal electron accepting processes. Environ. Sci. Technol. 46(21), 11702-11709. doi: 10.1021/es302145q
Wang, J., Muyzer, G., Bodelier, P.L.E., and Laanbroek, H.J. (2009). Diversity of iron oxidizers in wetland soils revealed by novel 16S rRNA primers targeting Gallionella-related bacteria. ISME J. 3, 715-725. doi: 10.1038/ismej.2009.7
Yu, Y., Lee, C., Kim, J., and Hwang, S. (2005). Group‐specific primer and probe sets to detect methanogenic communities using quantitative real‐time polymerase chain reaction. Biotechnol. Bioeng. 89(6), 670-679. doi: 10.1002/bit.20347
